# Supplementary material for: Factors associated with incomplete childhood immunization in Arbegona district, southern Ethiopia: a case – control study
Source: PubMed Central journal article supplement (PMC4711011; doi:10.1186/s12889-015-2678-1), 2016-01-12
Supplement: 12889_2015_2678_MOESM1_ESM.pdf [file 12889_2015_2678_MOESM1_ESM.pdf]

STROBE Statement—Checklist of items that should be included in reports of *case-control studies*

|                           | Item No | Recommendation                                                                                                                                                                                                                                                                                                                                                                                                                                                                                                                                                                                                                                                                                                                                                                                                                                                                                                                                                                                                                                                                                                                                                                                                                                                                                                                                                                                                                                                                                                                                                                                                                                                                                                                                                                                                                                                                                                                                                                                                                                                                                                                                                                                                                                                                                                                                                                                                                                                                                                     |
|---------------------------|---------|--------------------------------------------------------------------------------------------------------------------------------------------------------------------------------------------------------------------------------------------------------------------------------------------------------------------------------------------------------------------------------------------------------------------------------------------------------------------------------------------------------------------------------------------------------------------------------------------------------------------------------------------------------------------------------------------------------------------------------------------------------------------------------------------------------------------------------------------------------------------------------------------------------------------------------------------------------------------------------------------------------------------------------------------------------------------------------------------------------------------------------------------------------------------------------------------------------------------------------------------------------------------------------------------------------------------------------------------------------------------------------------------------------------------------------------------------------------------------------------------------------------------------------------------------------------------------------------------------------------------------------------------------------------------------------------------------------------------------------------------------------------------------------------------------------------------------------------------------------------------------------------------------------------------------------------------------------------------------------------------------------------------------------------------------------------------------------------------------------------------------------------------------------------------------------------------------------------------------------------------------------------------------------------------------------------------------------------------------------------------------------------------------------------------------------------------------------------------------------------------------------------------|
| <b>Title and abstract</b> | 1       | <p><b>Title:</b> Factors associated with incomplete childhood immunization in Arbegona district, southern Ethiopia: A case – control study</p> <hr/> <p><b>Abstract:</b></p> <p><b>Background:</b> The prevention of child mortality through immunization is one of the most cost-effective and widely applied public health interventions. In Ethiopia, the Expanded Program on Immunization (EPI) schedule is rarely completed as planned and the full immunization rate is only 24%. The objective of this study was to identify determinant factors of incomplete childhood immunization in Arbegona district, Sidama zone, southern Ethiopia.</p> <p><b>Methods:</b> A community based unmatched case-control study was undertaken among randomly selected children aged 12 to 23 months and with a total sample size of 548 (183 cases and 365 controls). A multi-stage sampling technique was used to get representative cases and controls. Data was collected using a structured questionnaire and analyzed using SPSS version 16 statistical software. Bivariate and multiple logistic regression analyses were done to identify independent factors for incomplete immunization status of children. Qualitative data were also generated and analyzed using thematic framework.</p> <p><b>Results:</b> The incomplete immunization status of children was significantly associated with young mothers (AOR = 9.54; 95% CI = 5.03, 18.09), being born second to fourth (AOR = 3.64; 95% CI = 1.63, 8.14) and being born fifth or later in the family (AOR = 5.27; 95% CI = 2.20, 12.64) as compared to being born first, a mother’s lack of knowledge about immunization benefits (AOR = 5.51; 95% CI = 1.52, 19.94) and a mother’s negative perception of vaccine side effects (AOR = 1.92; 95% CI = 1.01, 3.70). The qualitative finding revealed that the migration of mothers and unavailability of vaccines on appointed immunization dates were the major reasons for partial immunization of children.</p> <p><b>Conclusion:</b> To reduce the number of children with incomplete immunization status, the Arbegona district needs to consider specific planning for mothers with these risk profiles. A focus on strengthening health communication activities to raise immunization awareness and address concerns of vaccine side effects at community level is also needed. This could be achieved through integrating the immunization service to other elements of primary health care.</p> |
| <hr/> <b>Introduction</b> |         |                                                                                                                                                                                                                                                                                                                                                                                                                                                                                                                                                                                                                                                                                                                                                                                                                                                                                                                                                                                                                                                                                                                                                                                                                                                                                                                                                                                                                                                                                                                                                                                                                                                                                                                                                                                                                                                                                                                                                                                                                                                                                                                                                                                                                                                                                                                                                                                                                                                                                                                    |
| Background/<br>rationale  | 2       | <p>World-wide, immunization programs have had a tremendous impact on the prevalence of many life-threatening diseases. However, inadequate levels of immunization against childhood diseases remain a significant public health problem in resource-poor areas of the globe (page 3). Ethiopia is one of the countries with large number of incompletely vaccinated children and Penta 3 coverage in many regions of the country is below 80% (page 3 – 4). The effectiveness of immunization programs in resource-poor settings can be influenced by factors related to the vaccines in use, to health services or to communities. The relative effect of</p>                                                                                                                                                                                                                                                                                                                                                                                                                                                                                                                                                                                                                                                                                                                                                                                                                                                                                                                                                                                                                                                                                                                                                                                                                                                                                                                                                                                                                                                                                                                                                                                                                                                                                                                                                                                                                                                     |

each one of the above factors may significantly vary according to geographical areas. In this context, the understanding of local hurdles for effective immunization programs is crucial to develop and implement appropriate solutions (page 4).

|                |   |                                                                                                                                                                                                                                                                                                                                                                                                                                                                                                                                                                                                                                                                                                                                                                                                                                                                                                                                                                                                                                                                                                                                       |
|----------------|---|---------------------------------------------------------------------------------------------------------------------------------------------------------------------------------------------------------------------------------------------------------------------------------------------------------------------------------------------------------------------------------------------------------------------------------------------------------------------------------------------------------------------------------------------------------------------------------------------------------------------------------------------------------------------------------------------------------------------------------------------------------------------------------------------------------------------------------------------------------------------------------------------------------------------------------------------------------------------------------------------------------------------------------------------------------------------------------------------------------------------------------------|
| Objectives     | 3 | <ul style="list-style-type: none"> <li>- To examine socio-demographic characteristics among children with complete and incomplete immunization status in the Arbegona district, southern Ethiopia.</li> <li>- To examine mother's knowledge and attitude about immunization among children with complete and incomplete immunization status in the Arbegona district, southern Ethiopia.</li> <li>- To examine factors related to immunization service delivery among children with complete and incomplete immunization status in the Arbegona district, southern Ethiopia.</li> <li>- To identify factors associated with incomplete childhood immunization in the Arbegona district, southern Ethiopia.</li> </ul>                                                                                                                                                                                                                                                                                                                                                                                                                 |
| <b>Methods</b> |   |                                                                                                                                                                                                                                                                                                                                                                                                                                                                                                                                                                                                                                                                                                                                                                                                                                                                                                                                                                                                                                                                                                                                       |
| Study design   | 4 | Community-based, unmatched case-control study (page 4)                                                                                                                                                                                                                                                                                                                                                                                                                                                                                                                                                                                                                                                                                                                                                                                                                                                                                                                                                                                                                                                                                |
| Setting        | 5 | <p><b>Setting:</b> The study was conducted in Arbegona district which is one of the 19 districts in Sidama zone, SNNPRS, Ethiopia. (page 4)</p> <p><b>Period of recruitment:</b> September, 2013 – June, 2014</p> <p><b>Period of data collection:</b> January, 2014 – February, 2014</p>                                                                                                                                                                                                                                                                                                                                                                                                                                                                                                                                                                                                                                                                                                                                                                                                                                             |
| Participants   | 6 | <p><b>Eligibility criteria:</b> – Child age – 12 to 23 months<br/>– History of vaccination</p> <p><b>Cases:</b> Eligible Child who did not complete the recommended schedule of immunization.</p> <p><b>Controls:</b> Eligible child who had completed the recommended schedule of immunization.</p> <p><b>Sources of case and control selection:</b> A list of cases and controls were generated from Health facility records (EPI registration books). The required number of cases and controls was selected based on a probability proportional to the number of the children under one year of age in each selected <i>kebele</i>. (page 5)</p>                                                                                                                                                                                                                                                                                                                                                                                                                                                                                  |
| Variables      | 7 | <p><b>Outcome variable:</b> Childhood immunization status</p> <p><b>Exposure variables:</b></p> <ul style="list-style-type: none"> <li>- <b>Socio-demographic factors:</b> Mother's educational status, Mother's age, Family income, Sex of the child, Family size, Birth order, Birth interval, Father's educational status, Occupational status, Place of residence (rural/urban).</li> <li>- <b>Mother's knowledge and attitude about immunization:</b> Knowledge about benefits of immunization, Knowledge about EPI targeted diseases, Knowledge about vaccine side effects, Knowledge about schedule of vaccines, Attitude towards benefits of immunization, Perception about vaccine side effects, Attitude towards the service delivery</li> <li>- <b>Factors related to immunization service delivery:</b> Missed opportunity, Information delivery to mothers about immunization completion, Vaccine shortage/unavailability, Availability of immunization clinic, Integration of the immunization service with other services, Convenience of the immunization service, Postponing of the immunization schedule</li> </ul> |

|                              |    |                                                                                                                                                                                                                                                                                                                                                                                                                                                                                                                                                                                                   |
|------------------------------|----|---------------------------------------------------------------------------------------------------------------------------------------------------------------------------------------------------------------------------------------------------------------------------------------------------------------------------------------------------------------------------------------------------------------------------------------------------------------------------------------------------------------------------------------------------------------------------------------------------|
| Data sources/<br>measurement | 8* | For both cases and controls, quantitative data were collected using a pre-tested structured questionnaire. Qualitative methods (Focus Group Discussions and In-depth interviews) were employed to assess some factors related to immunization service delivery, which couldn't be assessed quantitatively. (page 5 – 6)                                                                                                                                                                                                                                                                           |
| Bias                         | 9  | The data were collected by trained diploma nurses who have experience of collecting a research data and the data collection process was closely monitored for data quality through regular field visits. (page 6)<br><br>The data collectors had no information about the immunization status of the children.                                                                                                                                                                                                                                                                                    |
| Study size                   | 10 | The sample size was generated using Epi-Info 6.04 statistical software (CDC, Atlanta, 2005) using the mother's educational level, which gives maximum sample size as compared to other variables to bring difference in the two groups.<br><br>The following parameters were used to calculate the sample size:<br>Confidence interval (CI): 95%<br>Power of test : 80%<br>Case to Control ratio: 1: 2<br>Non-response rate: 10%<br>Design effect: 2<br><br>The total number of the study participants was 548.<br><br>Total number of cases – 183<br><br>Total number of controls – 365 (page 5) |
| Quantitative<br>variables    | 11 | Standard groupings, used in other similar published studies, were considered in the analyses. Operational definitions of some variables were also used and the categories were defined by considering the context of the study area (literacy status of the mothers, the difficulty in getting health information, EPI coverage of the district etc....). (page 7)                                                                                                                                                                                                                                |
| Statistical<br>methods       | 12 | Data were coded, entered, cleaned, explored and finally analyzed using SPSS-version 16 statistical software.<br><br>First descriptive statistics were used to summarize the data, and a bivariate analysis was carried out to see the presence and degree of statistical association between the outcome and explanatory variables. In the multivariable analysis, backward stepwise logistic regression with $p$ -value $\leq 0.05$ was applied to identify independent predictors of incomplete childhood immunization, through controlling of potential confounding factors. (page 6)          |

---

## Results

|              |     |                                                                                                                                                                                                                                                                                                                                                    |
|--------------|-----|----------------------------------------------------------------------------------------------------------------------------------------------------------------------------------------------------------------------------------------------------------------------------------------------------------------------------------------------------|
| Participants | 13* | <p><b>Cases:</b><br/>Confirmed eligible and included in the study: 183<br/>Participated in the study and analysed: 182 (1 mother was not volunteer to participate)</p> <p><b>Controls:</b><br/>Confirmed eligible and included in the study: 365<br/>Participated in the study and analysed: 362 (3 mothers were not volunteer to participate)</p> |
|--------------|-----|----------------------------------------------------------------------------------------------------------------------------------------------------------------------------------------------------------------------------------------------------------------------------------------------------------------------------------------------------|

Descriptive  
data

14\*

Cases: (Table 2, page 22)

| Variables                             | Category               | No (%)     | Missing data |
|---------------------------------------|------------------------|------------|--------------|
| Maternal Age<br>(In years)            | ≤ 19                   | 81 (44.5)  |              |
|                                       | >19                    | 101 (55.5) |              |
| Occupational<br>status                | Housewife              | 56 (30.7)  |              |
|                                       | Farmer                 | 90 (49.4)  |              |
|                                       | Merchant               | 14 (7.7)   |              |
|                                       | Other                  | 22 (12)    |              |
| Monthly income<br>(In Ethiopian Birr) | ≤ 500                  | 122 (67)   |              |
|                                       | 500 - 1000             | 38 (20.8)  |              |
|                                       | ≥ 1000                 | 22 (12)    |              |
| Mother's educational<br>status        | Illiterate             | 116 (63.7) |              |
|                                       | Read and write         | 13 (7.1)   |              |
|                                       | Elementary             | 39 (21.4)  |              |
|                                       | Secondary and<br>above | 14 (7.7)   |              |
| Father's educational<br>status        | Illiterate             | 60 (33.3)  | 2            |
|                                       | Read and write         | 29 (16.1)  |              |
|                                       | Elementary             | 52 (28.8)  |              |
|                                       | Secondary and<br>above | 39 (21.6)  |              |
| Residence                             | Rural                  | 160 (87.9) |              |
|                                       | Urban                  | 22 (12.1)  |              |
| Family size                           | ≤ 5                    | 54 (29.6)  |              |
|                                       | > 5                    | 128 (70.4) |              |
| Child sex                             | Male                   | 107 (58.8) |              |
|                                       | Female                 | 75 (41.2)  |              |
| Birth order                           | 1                      | 20 (11.1)  | 2            |
|                                       | 2 - 4                  | 92 (51.1)  |              |
|                                       | ≥ 5                    | 68 (37.7)  |              |
| Birth interval<br>(In Months)         | ≤ 23                   | 51 (31.4)  |              |
|                                       | 24 – 47                | 93 (57.4)  |              |
|                                       | > 47                   | 18 (11.2)  |              |

**Controls:** (Table 2, page 22)

| Variables                      | Category               | No (%)     | Missing data |
|--------------------------------|------------------------|------------|--------------|
| Maternal Age<br>(In years)     | ≤ 19                   | 32 (8.9)   |              |
|                                | >19                    | 330 (91.1) |              |
| Occupational<br>status         | Housewife              | 118 (32.9) | 4            |
|                                | Farmer                 | 176 (49.1) |              |
|                                | Merchant               | 34 (9.5)   |              |
|                                | Other                  | 30 (8.3)   |              |
| Monthly income<br>(In ETB)     | ≤ 500                  | 217 (59.9) |              |
|                                | 500 - 1000             | 101 (27.9) |              |
|                                | ≥ 1000                 | 44 (12.1)  |              |
| Mother's<br>educational status | Illiterate             | 226 (62.4) |              |
|                                | Read and write         | 23 (6.3)   |              |
|                                | Elementary             | 75 (20.7)  |              |
|                                | Secondary and<br>above | 38 (10.5)  |              |
| Father's<br>educational status | Illiterate             | 133 (36.7) |              |
|                                | Read and write         | 53 (14.6)  |              |
|                                | Elementary             | 98 (27)    |              |
|                                | Secondary and<br>above | 78 (21.5)  |              |
| Residence                      | Rural                  | 320 (88.4) |              |
|                                | Urban                  | 42 (11.6)  |              |
| Family size                    | ≤ 5                    | 175 (48.3) |              |
|                                | > 5                    | 187 (51.7) |              |
| Child sex                      | Male                   | 201 (55.5) |              |
|                                | Female                 | 161 (44.5) |              |
| Birth order                    | 1                      | 119 (32.8) |              |
|                                | 2 - 4                  | 153 (42.2) |              |
|                                | ≥ 5                    | 90 (24.8)  |              |
| Birth interval<br>(In Months)  | ≤ 23                   | 66 (27.3)  |              |
|                                | 24 – 47                | 143 (59)   |              |
|                                | > 47                   | 33 (13.6)  |              |

**Mother's knowledge and attitude about immunization** (Table 3, page 24)

| Variables                                 | Category | No (%)     |
|-------------------------------------------|----------|------------|
| Knew about immunization                   | Yes      | 101 (55.5) |
|                                           | No       | 81 (44.5)  |
| Knew the schedule of vaccines             | Yes      | 50 (49.5)  |
|                                           | No       | 51 (50.5)  |
| Knew the benefits of immunization         | Yes      | 88 (87.9)  |
|                                           | No       | 13 (12.1)  |
| Knew about vaccine side effects           | Yes      | 25 (24.8)  |
|                                           | No       | 76 (75.2)  |
| Attitude towards benefits of immunization | Positive | 165 (94.8) |
|                                           | Negative | 9 (5.2)    |
| Perception about vaccine side effects     | Positive | 104 (60.1) |
|                                           | Negative | 69 (39.8)  |

**Factors related to immunization service delivery** (Table 4, page 25)

| Variables                                                              | Category | No (%)     |
|------------------------------------------------------------------------|----------|------------|
| Advised to vaccinate their child during their health institution visit | Yes      | 63 (85.1)  |
|                                                                        | No       | 11 (14.9)  |
| Information was received about the next vaccine schedule               | Yes      | 172 (95.6) |
|                                                                        | No       | 8 (4.4)    |
| Availability of immunization clinic                                    | Yes      | 145 (79.7) |
|                                                                        | No       | 37 (20.3)  |
| Difficulty of getting immunization shots                               | Yes      | 39 (21.7)  |
|                                                                        | No       | 141 (78.3) |
| Convenient hours for immunization                                      | Yes      | 63 (34.6)  |
|                                                                        | No       | 119 (65.4) |
| Postponing of the immunization schedule                                | Yes      | 63 (34.6)  |
|                                                                        | No       | 119 (65.4) |

---

**Controls:****Mother's knowledge and attitude about immunization** (Table 3, page 24)

| Variables                                 | Category | No (%)     |
|-------------------------------------------|----------|------------|
| Knew about immunization                   | Yes      | 263 (72.6) |
|                                           | No       | 99 (27.3)  |
| Knew the schedule of vaccines             | Yes      | 134 (51)   |
|                                           | No       | 129 (49)   |
| Knew the benefits of immunization         | Yes      | 256 (97.7) |
|                                           | No       | 6 (2.3)    |
| Knew about vaccine side effects           | Yes      | 47 (18)    |
|                                           | No       | 214 (82)   |
| Attitude towards benefits of immunization | Positive | 339 (96.6) |
|                                           | Negative | 12 (3.4)   |
| Perception about vaccine side effects     | Positive | 236 (65.9) |
|                                           | Negative | 122 (34.1) |

**Factors related to immunization service delivery** (Table 4, page 25)

| Variables                                                              | Category | No (%)     |
|------------------------------------------------------------------------|----------|------------|
| Advised to vaccinate their child during their health institution visit | Yes      | 116 (89.2) |
|                                                                        | No       | 14 (10.8)  |
| Information was received about the next vaccine schedule               | Yes      | 352 (97.5) |
|                                                                        | No       | 9 (2.5)    |
| Availability of immunization clinic                                    | Yes      | 287 (79.3) |
|                                                                        | No       | 75 (20.7)  |
| Difficulty of getting immunization shots                               | Yes      | 75 (20.7)  |
|                                                                        | No       | 287 (79.3) |
| Convenient hours for immunization                                      | Yes      | 224 (62.9) |
|                                                                        | No       | 132 (37.1) |
| Postponing of the immunization schedule                                | Yes      | 79 (21.8)  |
|                                                                        | No       | 283 (78.2) |

---

**Socio-demographic factors related to incomplete childhood immunization** (Table 2, page 22)

| Variables                   | Category            | Crude OR (95% CI)  | P-value  |
|-----------------------------|---------------------|--------------------|----------|
| Maternal Age (In years)     | ≤ 19                | 8.27 (5.19, 13.18) | < 0.001* |
|                             | > 19                | 1                  |          |
| Occupational status         | Housewife           | 0.92 (0.61, 1.39)  | 0.71     |
|                             | Farmer              | 1                  |          |
|                             | Merchant            | 0.80 (0.41, 1.57)  | 0.52     |
|                             | Other               | 1.43 (0.78, 2.62)  | 0.24     |
| Monthly income (In ETB)     | ≤ 500               | 1                  |          |
|                             | 500 - 1000          | 0.67 (0.43, 1.03)  | 0.07     |
|                             | ≥ 1000              | 0.89 (0.50, 1.55)  | 0.68     |
| Mother's educational status | Illiterate          | 1                  |          |
|                             | Read and write      | 1.10 (0.53, 2.25)  | 0.79     |
|                             | Elementary          | 1.01 (0.64, 1.58)  | 0.95     |
|                             | Secondary and above | 0.71 (0.37, 1.37)  | 0.31     |
| Father's educational status | Illiterate          | 1                  |          |
|                             | Read and write      | 1.21 (0.70, 2.09)  | 0.48     |
|                             | Elementary          | 1.17 (0.74, 1.85)  | 0.48     |
|                             | Secondary and above | 1.10 (0.67, 1.81)  | 0.68     |
| Residence                   | Rural               | 1                  |          |
|                             | Urban               | 1.04 (0.60, 1.81)  | 0.86     |
| Family size                 | ≤ 5                 | 0.45 (0.30, 0.65)  | < 0.001* |
|                             | > 5                 | 1                  |          |
| Child sex                   | Male                | 1                  |          |
|                             | Female              | 0.87 (0.60, 1.24)  | 0.46     |
| Birth order                 | 1                   | 1                  |          |
|                             | 2 - 4               | 3.57 (2.08, 6.13)  | < 0.001* |
|                             | ≥ 5                 | 4.49 (2.54, 7.94)  | < 0.001* |
| Birth interval (In Months)  | ≤ 23                | 1.18 (0.75, 1.86)  | 0.4      |
|                             | 24 - 47             | 1                  |          |
|                             | > 47                | 0.83 (0.44, 0.57)  | 0.5      |

\*Statistically significant at  $p < 0.05$

**Mother's knowledge and attitude about immunization** (Table 3, page 24)

| Variables                                             | Category | Crude OR<br>(95% CI) | P-value  |
|-------------------------------------------------------|----------|----------------------|----------|
| Knew about immunization                               | Yes      | 1                    | < 0.001* |
|                                                       | No       | 2.13 (1.46, 3.09)    |          |
| Knew the schedule of vaccines                         | Yes      | 1                    | 0.8      |
|                                                       | No       | 1.06 (0.67, 1.67)    |          |
| Knew the benefits of immunization                     | Yes      | 1                    | < 0.001* |
|                                                       | No       | 6.30 (2.32, 17.08)   |          |
| Knew about vaccine side effects                       | Yes      | 1.49 (0.85, 2.56)    | 0.16     |
|                                                       | No       | 1                    |          |
| Attitude towards benefits of immunization             | Positive | 1                    | 0.33     |
|                                                       | Negative | 1.54 (0.63, 3.73)    |          |
| Perception about vaccine side effects                 | Positive | 1                    | 0.21     |
|                                                       | Negative | 1.28 (0.86, 1.88)    |          |
| Attitude towards the last received child immunization | Positive | 1                    | 0.8      |
|                                                       | Negative | 0.97 (0.68, 1.39)    |          |

\*Statistically significant at  $p < 0.05$

**Factors related to immunization service delivery** (Table 4, page 25)

| Variables                                                              | Category | Crude OR (95% CI) | P-value |
|------------------------------------------------------------------------|----------|-------------------|---------|
| Advised to vaccinate their child during their health institution visit | Yes      | 1                 | 0.39    |
|                                                                        | No       | 1.44 (0.62, 3.37) |         |
| Information was received about the next vaccine schedule               | Yes      | 1                 | 0.22    |
|                                                                        | No       | 1.81 (0.69, 4.79) |         |
| Availability of immunization clinic                                    | Yes      | 1                 | 0.91    |
|                                                                        | No       | 0.97 (0.62, 1.51) |         |
| Difficulty of getting immunization shots                               | Yes      | 1.05 (0.68, 1.63) | 0.79    |
|                                                                        | No       | 1                 |         |
| Convenient hours for immunization                                      | Yes      | 1                 | 0.08    |
|                                                                        | No       | 0.70 (0.48, 1.04) |         |
| Postponing of the immunization schedule                                | Yes      | 1.89 (1.27, 2.81) | 0.001*  |
|                                                                        | No       | 1                 |         |

\*Statistically significant at  $p < 0.05$

**Predictors of incomplete childhood immunization status** (Table 5, page 26)

| Variables                                                         | Category   | Adjusted OR<br>(95% CI) | P-value  |
|-------------------------------------------------------------------|------------|-------------------------|----------|
| Maternal Age<br>(In years)                                        | ≤ 19       | 9.54 (5.03, 18.09)      | < 0.001* |
|                                                                   | > 19       | 1                       |          |
| Monthly income<br>(In ETB)                                        | ≤ 500      | 1                       |          |
|                                                                   | 500 - 1000 | 0.49 (0.23, 1.05)       | 0.07     |
|                                                                   | > 1000     | 1.59 (0.65, 3.85)       | 0.30     |
| Family size                                                       | ≤ 5        | 0.70 (0.34, 1.45)       | 0.34     |
|                                                                   | > 5        | 1                       |          |
| Birth order                                                       | 1          | 1                       |          |
|                                                                   | 2 - 4      | 3.64 (1.63, 8.14)       | < 0.001* |
|                                                                   | ≥ 5        | 5.27 (2.20, 12.64)      | 0.002*   |
| Knew the benefits<br>of immunization                              | Yes        | 1                       |          |
|                                                                   | No         | 5.51 (1.52, 19.94)      | 0.009*   |
| Knew about<br>vaccine side effects                                | Yes        | 0.96 (0.46, 2.01)       | 0.90     |
|                                                                   | No         | 1                       |          |
| Perception about<br>vaccine side effects                          | Positive   | 1                       |          |
|                                                                   | Negative   | 1.92 (1.01, 3.70)       | 0.05*    |
| Information was<br>received about the<br>next vaccine<br>schedule | Yes        | 1                       |          |
|                                                                   | No         | 0.20 (0.01, 2.45)       | 0.21     |
| Convenient hours<br>for immunization                              | Yes        | 1                       |          |
|                                                                   | No         | 1.06 (0.55, 2.04)       | 0.80     |
| Postponing of the<br>immunization<br>schedule                     | Yes        | 1.30 (0.70, 2.41)       | 0.39     |
|                                                                   | No         | 1                       |          |

\*Statistically significant at  $p < 0.05$ 

|                   |    |                                                                                                                                                                                                                                                                                                                                                                                                                                                                 |
|-------------------|----|-----------------------------------------------------------------------------------------------------------------------------------------------------------------------------------------------------------------------------------------------------------------------------------------------------------------------------------------------------------------------------------------------------------------------------------------------------------------|
| Other analyses    | 17 | Co-linearity diagnostic tests                                                                                                                                                                                                                                                                                                                                                                                                                                   |
| <b>Discussion</b> |    |                                                                                                                                                                                                                                                                                                                                                                                                                                                                 |
| Key results       | 18 | The study assessed different factors and the variables which showed a significant association with incomplete immunization status; were maternal age, birth order, knowledge about immunization benefits and perception of vaccine side effects. (page 10)<br>Unavailability of vaccines on appointed immunization dates and migration of mothers were also indicated as key reasons for incomplete childhood immunization by the qualitative method. (page 11) |
| Limitations       | 19 | Recall bias where mothers might not remember past histories for some immunization service delivery related questions.                                                                                                                                                                                                                                                                                                                                           |

|                          |    |                                                                                                                                              |
|--------------------------|----|----------------------------------------------------------------------------------------------------------------------------------------------|
| Interpretation           | 20 | In order to identify the EPI performance problems, still understanding the local challenges of immunization programs is of great importance. |
| Generalisability         | 21 | The study results can be generalised to other Ethiopian districts with similar socio-demographic characteristics.                            |
| <b>Other information</b> |    |                                                                                                                                              |
| Funding                  | 22 | The study was supported by Jimma University.                                                                                                 |

\*Give information separately for cases and controls

**Note:** An Explanation and Elaboration article discusses each checklist item and gives methodological background and published examples of transparent reporting. The STROBE checklist is best used in conjunction with this article (freely available on the Web sites of PLoS Medicine at <http://www.plosmedicine.org/>, Annals of Internal Medicine at <http://www.annals.org/>, and Epidemiology at <http://www.epidem.com/>). Information on the STROBE Initiative is available at <http://www.strobe-statement.org>.
